# Supplementary material for: Unexpected diagnosis of WHIM syndrome in refractory autoimmune cytopenia
Source: PubMed Central journal article supplement — Blood Adv. 2024 Jul 22;8(19):5126–36. doi: 10.1182/bloodadvances.2024013301 (PMC11460441; doi:10.1182/bloodadvances.2024013301), 2024-07-22
Supplement: BLOODA_ADV-2024-013301-mmc1.pdf [file BLOODA_ADV-2024-013301-mmc1.pdf]

## Supplemental Table 1. Mutagenesis primers

| Primer         | Sequence                         |
|----------------|----------------------------------|
| V320fx23 FWD   | GCACGCACTCACCTCTG*AGCAGAGGGTCCAG |
| V320fx23 REV   | CTGGACCCTCTGCT*CAGAGGTGAGTGCGTGC |
| R334X FWD      | CTCTCCAAAGGAAAGTGAGGTGGACATTCAT  |
| R334X REV      | ATGAATGTCCACCTCACTTTCTTTGGAGAG   |
| S338X FWD      | AGCGAGGTGGACATTGATCTGTTTCCACTGA  |
| S338X REV      | TCAGTGGAACAGATCAATGTCCACCTCGCT   |
| S319CfsX24 FWD | CACGCACTCACCT*GTGAGCAGAGGGT      |
| S319CfsX24 REV | ACCCTCTGCTCAC*AGGTGAGTGCGTG      |

Bold: change of base  
 \* : deletion site

### Legend:

**Supplemental Figure 1. Structure and signaling of CXCR4 mutants. (A)** CXCR4 expression in HEK-293T cells WT and CXCR4<sup>-/-</sup> after CRISPR analyzed by WB. **(B)** Representative flow cytometry histograms showing CXCR4 expression in NALM6 cells WT and CXCR4<sup>-/-</sup> after CRISPR. **(C)** CXCR4 expression in HEK-293T CXCR4<sup>-/-</sup> and transduced with WT or CXCR4 variants by WB. **(D)** Representative flow cytometry histograms of NALM6 CXCR4<sup>-/-</sup> cells transduced with WT or CXCR4 mutants. **(E)** Three-dimensional structure of CXCR4. Left panel: Nt domain (gray) is in the extracellular space. The Ct domain (Red) is in the cytoplasmic compartment. Lower-right panel: WT CXCR4 Ct domain shows S324 and S325, the phosphorylation sites after ligand binding. It is also indicated the position of V320. Upper-right panel: molecular structure predicted for the Ct domain of CXCR4<sup>V320fsX23</sup>. **(F)** The schematic structure of C-terminus CXCR4 that reports sites of mutation (noted and highlighted in green); ubiquitination motif is indicated in red and dileucine motif in orange; degradation motif and internalization/b-arrestin binding domains are shown.

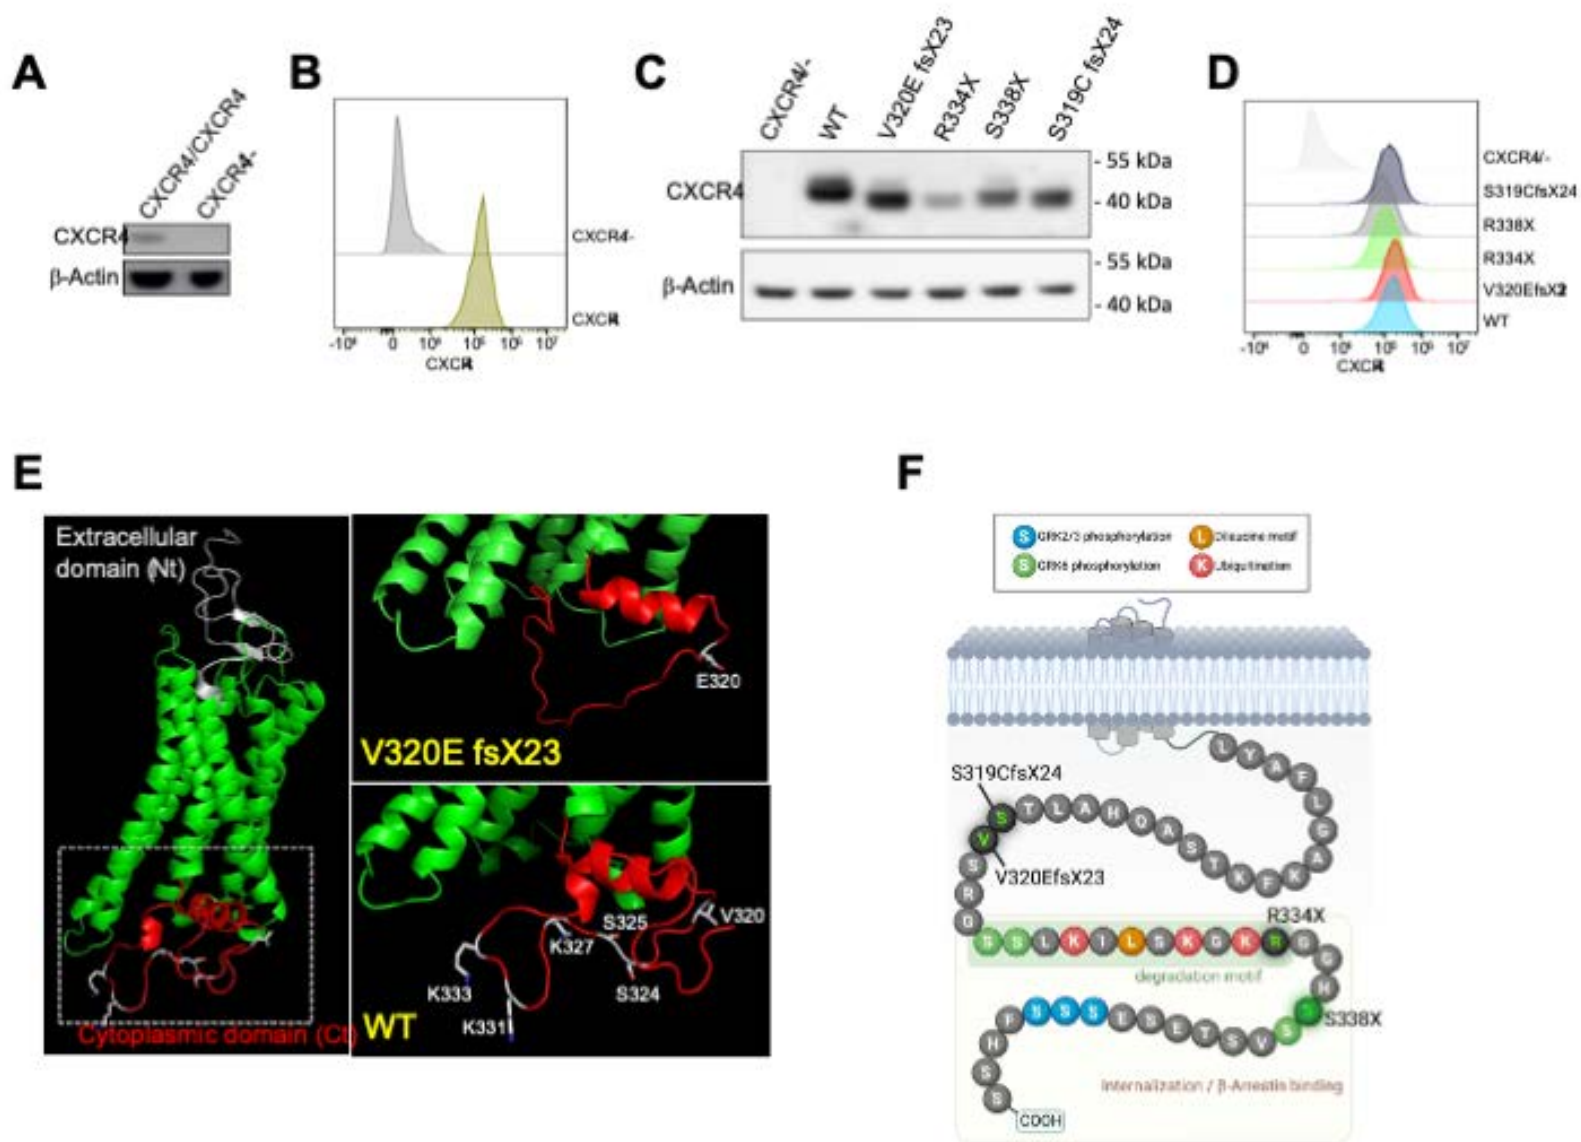

Supplemental figure 1
